# Supplementary figures and images for: Mesenchymal stem cells sense mitochondria released from damaged cells as danger signals to activate their rescue properties
Source: PubMed Central journal article supplement — Cell Death Differ. 2017 May 19;24(7):1224–38. doi: 10.1038/cdd.2017.51 (PMC5520168; doi:10.1038/cdd.2017.51), 2017-05-19

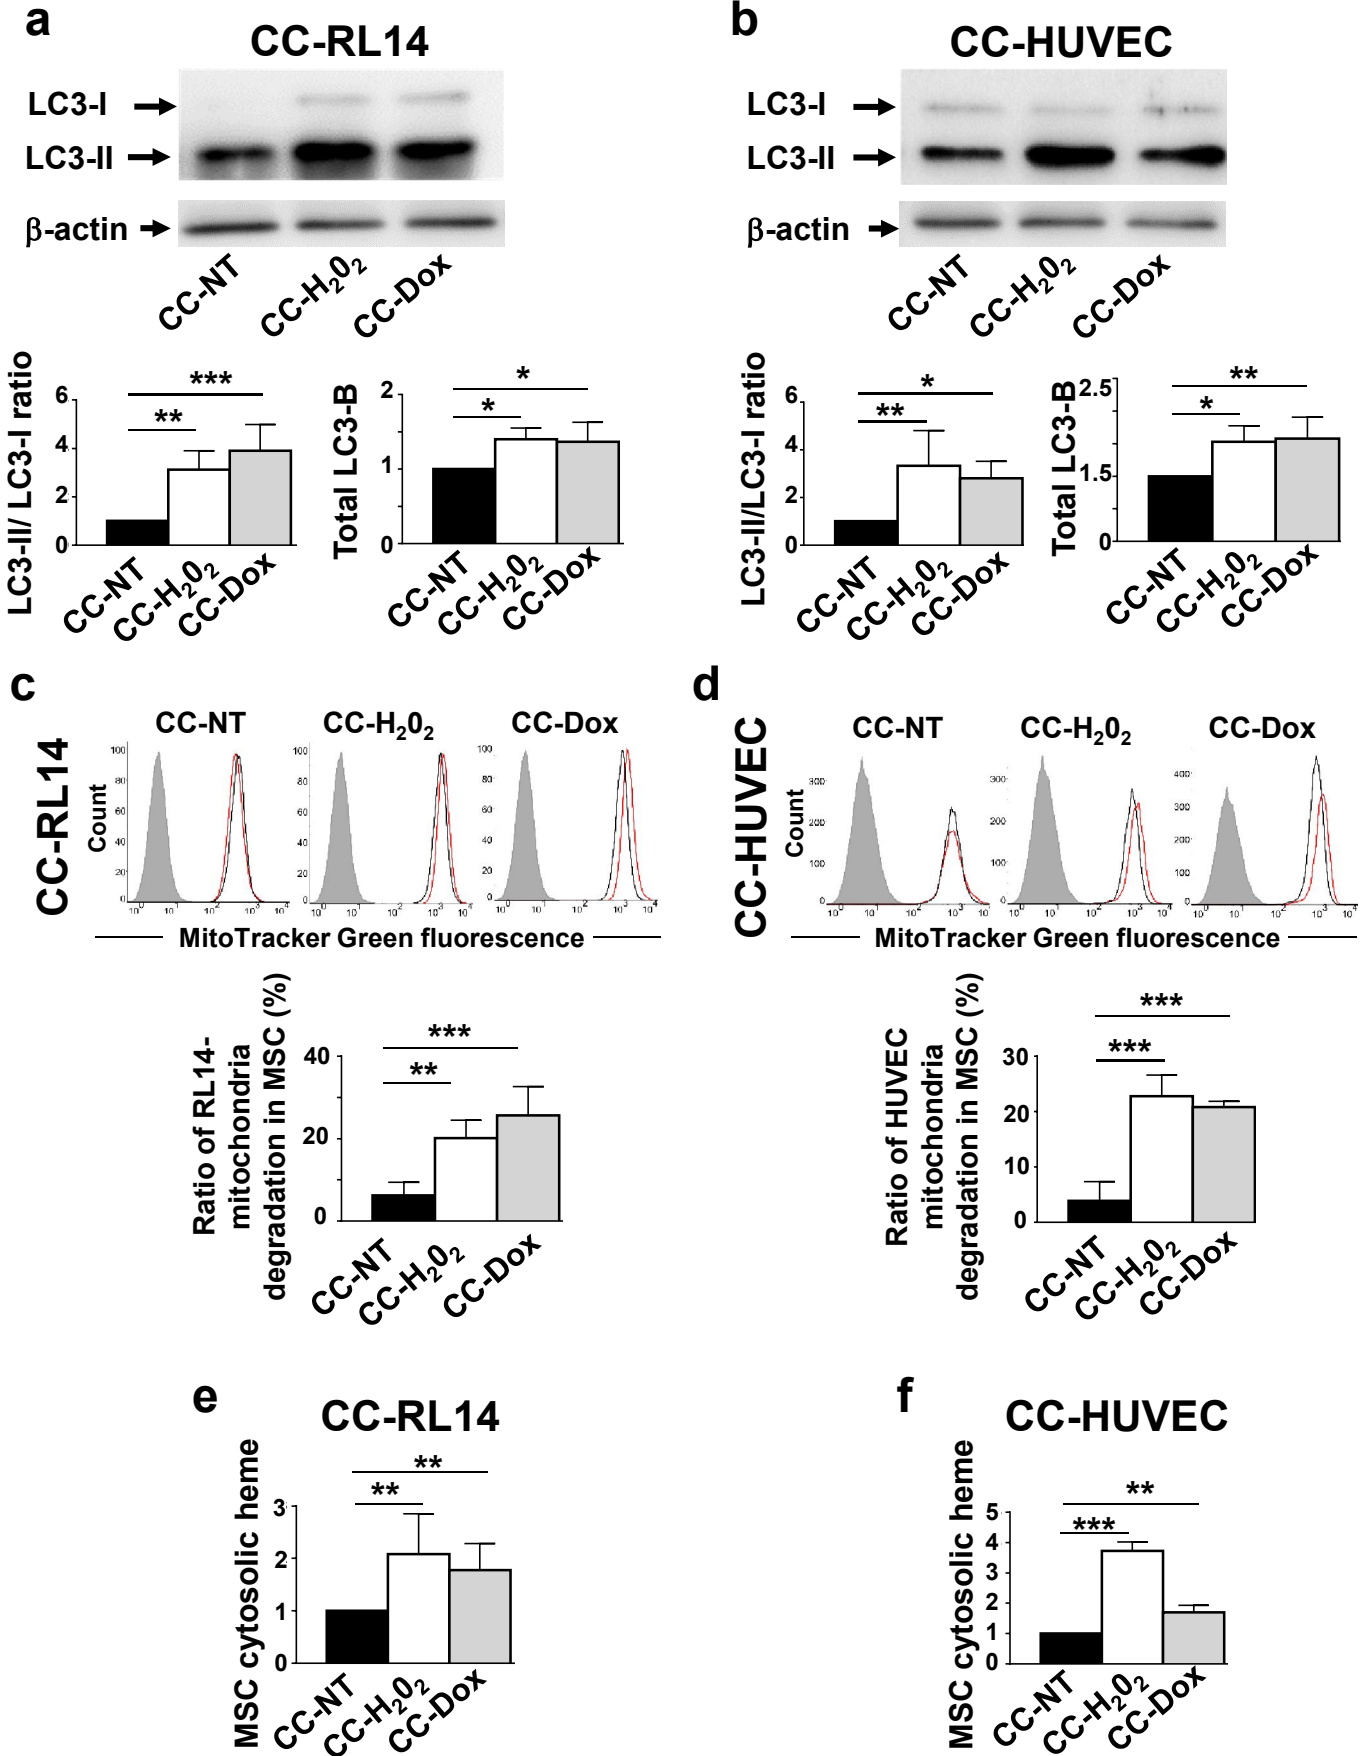

Supplement: cdd201751x2.pdf [file cdd201751x2.pdf]

## Supplementary Figure 2

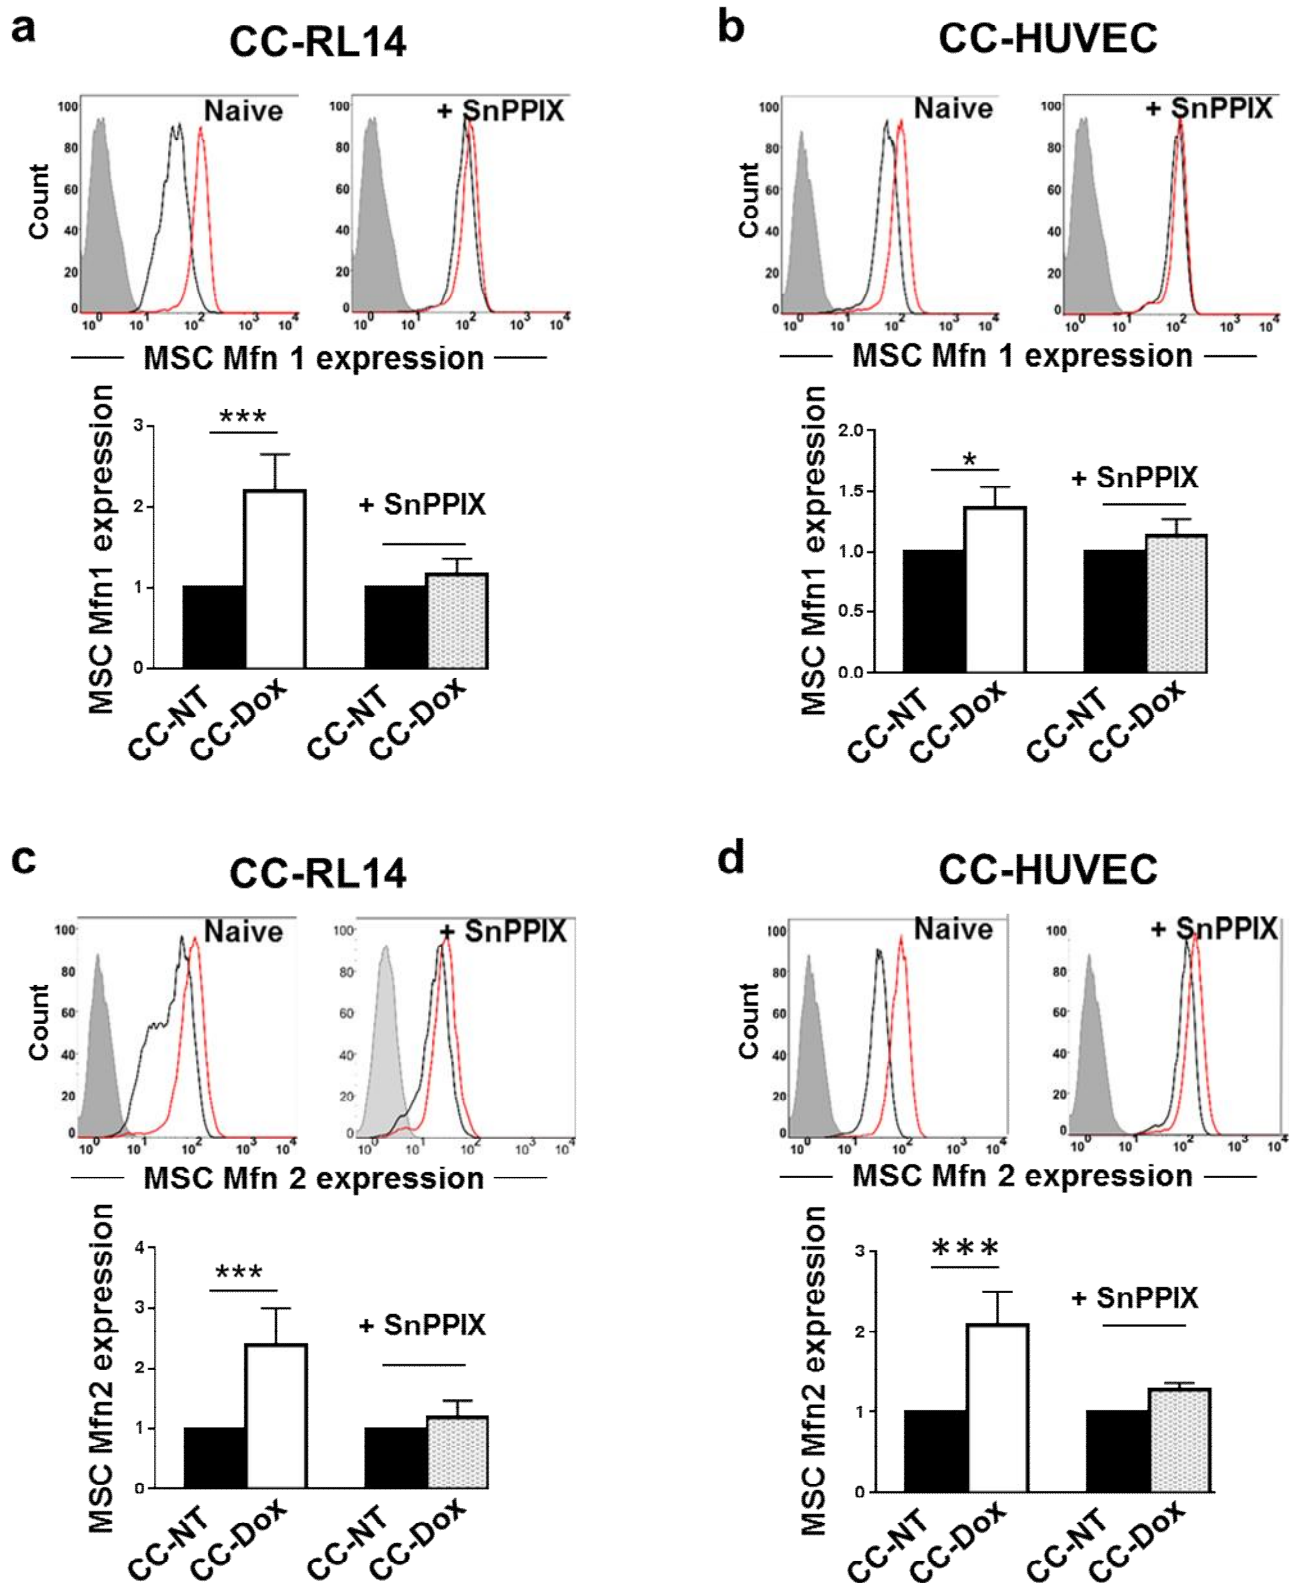

Supplement: cdd201751x3.pdf [file cdd201751x3.pdf]

# Supplementary Figure 3

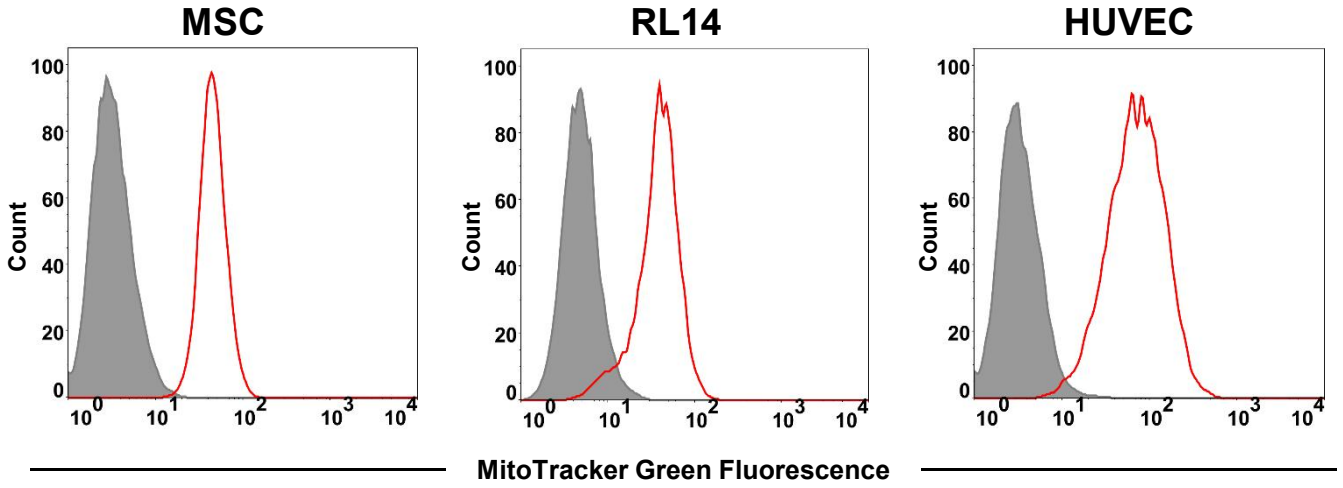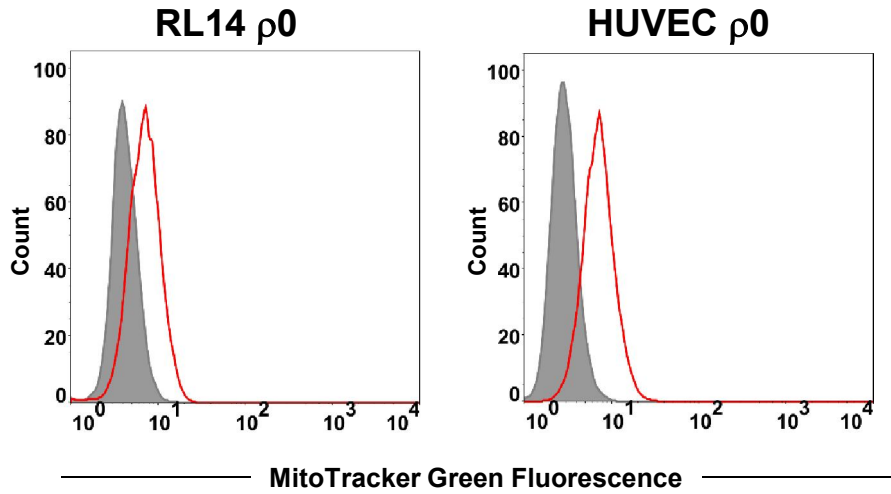

Supplement: cdd201751x4.pdf [file cdd201751x4.pdf]
